# Supplementary material for: A Transcriptomic Analysis of Phenotypic Plasticity in Crassostrea virginica Larvae under Experimental Acidification
Source: MDPI journal article supplement (doi:10.3390/genes13091529), 2022-08-25
Supplement: s1 [file s1]

**Supplementary Information**

*Dissolved Inorganic Carbon*

Details of water chemistry conditions are provided in Table S1. Carbonate chemistry matched the target  $p\text{CO}_2$  for the ambient and elevated treatments. pH levels in the treatment were approximately 8.1 and 7.5 for the ambient and elevated treatments, respectively. In the elevated  $p\text{CO}_2$  condition aragonite was undersaturated.

**Table S1.** Seawater chemistry values  $\pm$  SD. \* denotes values calculated with *seacarb*.

| Treatment | pH              | $p\text{CO}_2$ (ppm)* | $\Omega_{\text{aragonite}}$ * | $\Omega_{\text{calcite}}$ * | DIC*                | $\text{CO}_3$ ( $\mu\text{mol/kg}$ )* | ALK( $\mu\text{eq/kg}$ )* |
|-----------|-----------------|-----------------------|-------------------------------|-----------------------------|---------------------|---------------------------------------|---------------------------|
| Ambient   | 8.14 $\pm$ 0.08 | 322.57 $\pm$ 78.74    | 3.36 $\pm$ 0.54               | 5.20 $\pm$ 0.83             | 1981.30 $\pm$ 35.41 | 209.07 $\pm$ 33.58                    | 2268.11 $\pm$ 67.95       |
| Elevated  | 7.49 $\pm$ 0.09 | 1600.23 $\pm$ 346.23  | 0.83 $\pm$ 0.15               | 1.28 $\pm$ 0.24             | 2060.09 $\pm$ 44.85 | 51.61 $\pm$ 9.49                      | 2084.47 $\pm$ 46.61       |

*Results of mortality and growth of larvae in each replicate tank*

**Table S2.** Average size and mortality of larvae in each tank at Time 0 (before reciprocal transplant)

| <b>Treatment</b> | <b>Tank</b> | <b>Size T0</b> | <b>Mortality (%) T0</b> |
|------------------|-------------|----------------|-------------------------|
| <b>Ambient</b>   | 1           | 54.96          | 5.69                    |
| <b>Ambient</b>   | 2           | 55.13          | 3.99                    |
| <b>Ambient</b>   | 3           | 53.15          | 4.17                    |
| <b>Ambient</b>   | 4           | 53.55          | 3.61                    |
| <b>Elevated</b>  | 1           | 50.62          | 14.21                   |
| <b>Elevated</b>  | 2           | 53.39          | 7.00                    |
| <b>Elevated</b>  | 3           | 53.02          | 10.53                   |
| <b>Elevated</b>  | 4           | 51.42          | 10.03                   |

**Table S3.** Average size and mortality of larvae in each tank after reciprocal transplant

| Treatment | Tank | Size   | Mortality (%) |
|-----------|------|--------|---------------|
| AA        | 1    | 129.54 | 30.71         |
| AA        | 2    | 127.59 | 23.73         |
| AA        | 3    | 128.86 | 31.51         |
| AA        | 4    | 129.38 | 13.10         |
| AE        | 1    | 113.08 | 45.00         |
| AE        | 2    | 119.18 | 31.63         |
| AE        | 3    | 117.82 | 65.74         |
| AE        | 4    | 117.87 | 50.00         |
| EE        | 1    | 113.64 | 52.38         |
| EE        | 2    | 114.19 | 32.50         |
| EE        | 3    | 113.50 | 34.78         |
| EE        | 4    | 114.30 | 59.32         |
| EA        | 1    | 117.63 | 28.81         |
| EA        | 2    | 116.67 | 19.13         |
| EA        | 3    | 117.48 | 18.90         |
| EA        | 4    | 117.93 | 21.03         |

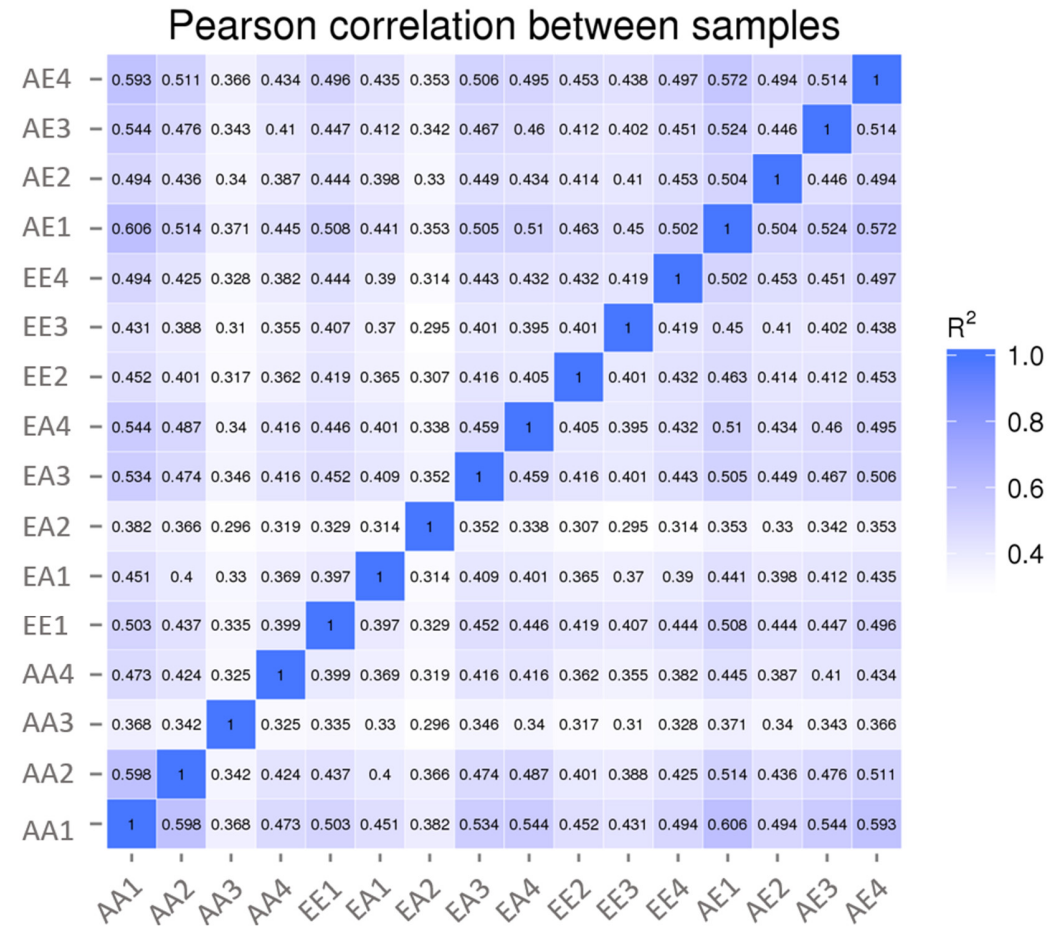

**Figure S1.** Pearson's correlation coefficient matrix for all samples included in the DEG analysis. Sample code names: First letter signifies original  $p\text{CO}_2$  treatment (A: Ambient, E: Elevated); Second letter signifies final  $p\text{CO}_2$  treatment (first and second letters are different for transplanted treatments); Number: replicate number.

**Table S4. DEGs for the 4 comparisons: AA vs EE, AA vs AE, EE vs EA, and AE vs EA.** Positive Log2 fold changes indicate genes over-expressed in the second group within each pair.

| AA versus EE |              |              |                |          |          |                                                                                                                                  |
|--------------|--------------|--------------|----------------|----------|----------|----------------------------------------------------------------------------------------------------------------------------------|
| Gene_id      | readcount_AA | readcount_EE | log2FoldChange | pval     | padj     | Blast swiss prot                                                                                                                 |
| Upregulated  |              |              |                |          |          |                                                                                                                                  |
| 111100330    | 88.69611177  | 210.8158723  | 1.249          | 6.95E-06 | 0.00458  | -/-                                                                                                                              |
| 111100642    | 19.91430259  | 76.3138497   | 1.9381         | 2.38E-06 | 0.002075 | -/-                                                                                                                              |
| 111101544    | 51.68508115  | 139.7061414  | 1.4346         | 2.21E-05 | 0.011235 | -/-                                                                                                                              |
| 111103490    | 12.76684569  | 56.88007324  | 2.1555         | 0.00012  | 0.045398 | sp Q90705 EF2_CHICK Elongation factor 2 OS=Gallus gallus OX=9031 GN=EEF2 PE=1 SV=3//0                                            |
| 111114894    | 44.53737794  | 169.3873295  | 1.9272         | 4.66E-10 | 1.18E-06 | sp Q5FWI3 TMEM2_MOUSE Cell surface hyaluronidase OS=Mus musculus OX=10090 GN=Tmem2 PE=1 SV=1//4.31771e-106                       |
| 111117016    | 16.09444219  | 64.52559379  | 2.0033         | 1.65E-06 | 0.001548 | sp P0DN10 VKT6_ANEVI U-actitoxin-Avd3i OS=Anemonia viridis OX=51769 PE=3 SV=1//9.87077e-17                                       |
| 111117698    | 3.725498611  | 37.1461754   | 3.3177         | 3.24E-06 | 0.002507 | -/-                                                                                                                              |
| 111120277    | 77.23102117  | 165.0218308  | 1.0954         | 6.08E-06 | 0.004159 | sp Q7Z410 TMPS9_HUMAN Transmembrane protease serine 9 OS=Homo sapiens OX=9606 GN=TMPRSS9 PE=1 SV=2//2.09781e-73                  |
| 111122709    | 36.47136117  | 128.7121621  | 1.8193         | 1.34E-05 | 0.007442 | -/-                                                                                                                              |
| 111123064    | 20.07882573  | 85.94842481  | 2.0978         | 6.66E-07 | 0.000849 | sp P55906 BGH3_BOVIN Transforming growth factor-beta-induced protein ig-h3 OS=Bos taurus OX=9913 GN=TGFB1 PE=1 SV=2//1.51711e-13 |
| 111125413    | 160.001551   | 371.7078839  | 1.2161         | 1.90E-07 | 0.000338 | sp Q9BZE4 NOG1_HUMAN Nucleolar GTP-binding protein 1 OS=Homo                                                                     |



|           |             |             |         |          |          |                                                                                                                                   |
|-----------|-------------|-------------|---------|----------|----------|-----------------------------------------------------------------------------------------------------------------------------------|
| 111101484 | 178.3572098 | 38.51857784 | -2.2111 | 7.45E-12 | 2.65E-08 | -/-                                                                                                                               |
| 111106582 | 17.2093693  | 0.186750842 | -6.5259 | 5.39E-06 | 0.003864 | -/-                                                                                                                               |
| 111109677 | 59.03435919 | 16.94737493 | -1.8005 | 4.34E-05 | 0.020316 | sp P07746 HMGT_ONCMY High mobility group-T protein<br>OS=Oncorhynchus mykiss OX=8022<br>PE=2 SV=2//1.16947e-18                    |
| 111114597 | 184.1920586 | 60.70997762 | -1.6012 | 6.69E-07 | 0.000849 | sp Q05825 ATPB_DROME ATP synthase subunit beta, mitochondrial<br>OS=Drosophila melanogaster OX=7227<br>GN=ATPsynbeta PE=1 SV=3//0 |
| 111118395 | 14.30560391 | 0           | Inf     | 1.12E-05 | 0.006428 | -/-                                                                                                                               |
| 111120247 | 16.08723956 | 0.831811824 | -4.2735 | 0.000123 | 0.045398 | -/-                                                                                                                               |
| 111123230 | 21.27666316 | 0.332724729 | -5.9988 | 7.43E-07 | 0.00088  | sp Q96RW7 HMCN1_HUMAN Hemicentin-1 OS=Homo sapiens<br>OX=9606 GN=HMCN1 PE=1<br>SV=2//1.74072e-46                                  |
| 111125329 | 32.98025412 | 5.067092044 | -2.7024 | 5.20E-05 | 0.022351 | sp Q8MP06 SNO1_TYRJA Senecionine N-oxygenase OS=Tyria jacobaeae<br>OX=179666 GN=sno1 PE=1<br>SV=1//6.40554e-61                    |
| 111125850 | 240.5462489 | 100.0921112 | -1.265  | 8.77E-05 | 0.034654 | sp A5YM72 CRNS1_HUMAN Carnosine synthase 1 OS=Homo sapiens<br>OX=9606 GN=CARNS1 PE=1<br>SV=3//2.48936e-180                        |
| 111125973 | 520.6706868 | 190.2687231 | -1.4523 | 0.000121 | 0.045398 | sp Q26065 ACT_PLAMG Actin, adductor muscle OS=Placopecten magellanicus<br>OX=6577 PE=2 SV=1//0                                    |
| 111126272 | 87.3477924  | 14.2946033  | -2.6113 | 1.08E-09 | 2.40E-06 | sp Q80ZA4 PKHL1_MOUSE Fibrocystin-L OS=Mus musculus<br>OX=10090 GN=Pkh111 PE=1 SV=1//0                                            |

|           |             |             |          |          |          |                                                                                                                              |
|-----------|-------------|-------------|----------|----------|----------|------------------------------------------------------------------------------------------------------------------------------|
| 111127289 | 459.8336847 | 251.4168017 | -0.87103 | 8.72E-05 | 0.034654 | sp Q9U639 HSP7D_MANSE Heat shock 70 kDa protein cognate 4 OS=Manduca sexta OX=7130 PE=2 SV=1//0                              |
| 111127865 | 105.4211755 | 11.50627458 | -3.1957  | 1.03E-12 | 6.13E-09 | -/-                                                                                                                          |
| 111128647 | 34.19475994 | 3.637505291 | -3.2328  | 8.61E-06 | 0.005278 | sp P00773 CELA1_RAT Chymotrypsin-like elastase family member 1 OS=Rattus norvegicus OX=10116 GN=Cela1 PE=1 SV=1//2.14068e-48 |
| 111131442 | 121.2944165 | 33.72761368 | -1.8465  | 1.02E-06 | 0.001138 | sp B3EWZ3 CADN_ACRMI Coadhesin (Fragment) OS=Acropora millepora OX=45264 PE=1 SV=1//2.18435e-06                              |
| 111132959 | 45.99994804 | 8.927179544 | -2.3654  | 4.14E-05 | 0.019894 | -/-                                                                                                                          |
| 111134775 | 342.373583  | 135.7700571 | -1.3344  | 1.33E-07 | 0.000262 | sp Q96RW7 HMCN1_HUMAN Hemicentin-1 OS=Homo sapiens OX=9606 GN=HMCN1 PE=1 SV=2//1.10244e-47                                   |
| 111134777 | 19.97423914 | 0.933754208 | -4.419   | 4.98E-05 | 0.022351 | sp D3YXG0 HMCN1_MOUSE Hemicentin-1 OS=Mus musculus OX=10090 GN=Hmcn1 PE=1 SV=1//1.87326e-26                                  |
| 111134779 | 385.5610708 | 90.73851437 | -2.0872  | 2.43E-14 | 2.16E-10 | sp Q96RW7 HMCN1_HUMAN Hemicentin-1 OS=Homo sapiens OX=9606 GN=HMCN1 PE=1 SV=2//1.53322e-44                                   |
| 111134780 | 136.7151343 | 25.45445569 | -2.4252  | 2.38E-10 | 7.04E-07 | sp B3EWZ3 CADN_ACRMI Coadhesin (Fragment) OS=Acropora millepora OX=45264 PE=1 SV=1//4.35e-19                                 |
| 111134925 | 153.2693434 | 68.6577348  | -1.1586  | 0.000138 | 0.049919 | sp P04113 MLRA_MIZYE Myosin regulatory light chain A, smooth adductor muscle OS=Mizuhopecten                                 |



|                     |              |              |                |          |          | yessoensis OX=6573 PE=1<br>SV=1//1.63683e-74                                                                                                 |
|---------------------|--------------|--------------|----------------|----------|----------|----------------------------------------------------------------------------------------------------------------------------------------------|
| 111135192           | 245.9214829  | 93.6219809   | -1.3933        | 5.43E-06 | 0.003864 | sp P51893 SAHHA_XENLA<br>Adenosylhomocysteinase A<br>OS=Xenopus laevis OX=8355 GN=ahcy-a<br>PE=2 SV=1//0                                     |
| 111135859           | 315.4422657  | 142.5180152  | -1.1462        | 1.05E-05 | 0.006241 | sp P41824 YBOXH_APLCA Y-box<br>factor homolog OS=Aplysia californica<br>OX=6500 PE=2 SV=1//3.10543e-44                                       |
| 111137234           | 253.0849586  | 44.52282664  | -2.507         | 9.21E-15 | 1.64E-10 | sp B3EWZ3 CADN_ACRMI Coadhesin<br>(Fragment) OS=Acropora millepora<br>OX=45264 PE=1 SV=1//3.0659e-27                                         |
| 111137486           | 2630.939326  | 1372.765336  | -0.93849       | 2.45E-06 | 0.002075 | sp P11833 TBB_PARLI Tubulin beta<br>chain OS=Paracentrotus lividus OX=7656<br>PE=2 SV=1//0                                                   |
| 111138187           | 106.3470696  | 36.28579149  | -1.5513        | 1.60E-05 | 0.00837  | sp Q5RAP9 AT5G2_PONAB ATP<br>synthase F(0) complex subunit C2,<br>mitochondrial OS=Pongo abelii OX=9601<br>GN=ATP5MC2 PE=2 SV=1//6.41103e-21 |
|                     |              |              |                |          |          |                                                                                                                                              |
| <b>AA versus AE</b> |              |              |                |          |          |                                                                                                                                              |
| Gene_id             | readcount_AA | readcount_AE | log2FoldChange | pval     | padj     | Blast swiss prot                                                                                                                             |
| Upregulated         |              |              |                |          |          |                                                                                                                                              |
| 111113165           | 110.2138444  | 371.9782772  | 1.7549         | 8.96E-10 | 1.69E-05 | sp P10079 FBP1_STRPU Fibropellin-1<br>OS=Strongylocentrotus purpuratus<br>OX=7668 GN=EGF1 PE=1 SV=2//3.1654e-07                              |
| 111114894           | 58.43435151  | 240.5317121  | 2.0413         | 1.40E-08 | 0.000131 | sp Q5FWI3 TMEM2_MOUSE Cell<br>surface hyaluronidase OS=Mus                                                                                   |

|                     |              |              |                |          |          |                                                                                                                                           |
|---------------------|--------------|--------------|----------------|----------|----------|-------------------------------------------------------------------------------------------------------------------------------------------|
|                     |              |              |                |          |          | musculus OX=10090 GN=Tmem2 PE=1<br>SV=1//4.31771e-106                                                                                     |
| 111121938           | 44.8220669   | 137.6595659  | 1.6188         | 5.42E-06 | 0.017001 | -/-                                                                                                                                       |
| 111123064           | 26.49478969  | 105.8034765  | 1.9976         | 4.02E-06 | 0.015155 | sp P55906 BGH3_BOVIN Transforming<br>growth factor-beta-induced protein ig-h3<br>OS=Bos taurus OX=9913 GN=TGFB1<br>PE=1 SV=2//1.51711e-13 |
| 111128774           | 12.01024384  | 89.7447449   | 2.9016         | 3.58E-08 | 0.000224 | sp Q9UHN6 TMEM2_HUMAN Cell<br>surface hyaluronidase OS=Homo<br>sapiens OX=9606 GN=TMEM2 PE=1<br>SV=1//8.47923e-104                        |
| 111138467           | 422.1143669  | 1076.218799  | 1.3503         | 2.08E-06 | 0.009791 | -/-                                                                                                                                       |
| Downregulated       |              |              |                |          |          |                                                                                                                                           |
| NONE                |              |              |                |          |          |                                                                                                                                           |
|                     |              |              |                |          |          |                                                                                                                                           |
| <b>EE versus EA</b> |              |              |                |          |          |                                                                                                                                           |
| Gene_id             | readcount_EE | readcount_EA | log2FoldChange | pval     | padj     | Blast swiss prot                                                                                                                          |
| Upregulated         |              |              |                |          |          |                                                                                                                                           |
| 111114597           | 64.45414549  | 164.5642875  | 1.3523         | 1.10E-05 | 0.022421 | sp Q05825 ATPB_DROME ATP<br>synthase subunit beta, mitochondrial<br>OS=Drosophila melanogaster OX=7227<br>GN=ATPsynbeta PE=1 SV=3//0      |
| 111134779           | 95.96920963  | 220.146285   | 1.1978         | 4.63E-06 | 0.010763 | sp Q96RW7 HMCN1_HUMAN<br>Hemicentin-1 OS=Homo sapiens<br>OX=9606 GN=HMCN1 PE=1<br>SV=2//1.53322e-44                                       |
| 111137234           | 47.33366626  | 190.8708725  | 2.0117         | 4.82E-10 | 7.84E-06 | sp B3EWZ3 CADN_ACRMI Coadhesin<br>(Fragment) OS=Acropora millepora<br>OX=45264 PE=1 SV=1//3.0659e-27                                      |

|               |              |              |                |          |          |                                                                                                                                         |
|---------------|--------------|--------------|----------------|----------|----------|-----------------------------------------------------------------------------------------------------------------------------------------|
| 111137486     | 1453.663328  | 2320.429939  | 0.6747         | 3.63E-06 | 0.009849 | sp P11833 TBB_PARLI Tubulin beta chain OS=Paracentrotus lividus OX=7656 PE=2 SV=1//0                                                    |
| Downregulated |              |              |                |          |          |                                                                                                                                         |
| 111134528     | 579.5548922  | 309.704688   | -0.90405       | 2.30E-06 | 0.007499 | sp Q5VYJ5 MALR1_HUMAN MAM and LDL-receptor class A domain-containing protein 1 OS=Homo sapiens OX=9606 GN=MALRD1 PE=1 SV=4//3.73958e-12 |
|               |              |              |                |          |          |                                                                                                                                         |
| AE versus EA  |              |              |                |          |          |                                                                                                                                         |
| Gene_id       | readcount_AE | readcount_EA | log2FoldChange | pval     | padj     | Blast swiss prot                                                                                                                        |
| Upregulated   |              |              |                |          |          |                                                                                                                                         |
| NONE          |              |              |                |          |          |                                                                                                                                         |
| Downregulated |              |              |                |          |          |                                                                                                                                         |
| 111113165     | 389.3810338  | 141.1739869  | -1.4637        | 4.77E-07 | 0.008519 | sp P10079 FBP1_STRPU Fibropellin-1 OS=Strongylocentrotus purpuratus OX=7668 GN=EGF1 PE=1 SV=2//3.1654e-07                               |

### *Gene Ontology Analysis*

A comparison of significant GO terms enriched between AA and EE yielded one term broadly related to molecular function and two terms related to biological processes, all three of which were upregulated in EE (Supplementary data Table S3). The GO term with molecular function was found to be involved in arabinosyltransferase activity (hypergeometric test,  $p=0.00063$ ). The GO terms involved in biological processes were found to function in actinobacterium-type cell wall biogenesis (hypergeometric test,  $p=0.00063$ ) and peptidoglycan-based cell wall biogenesis (hypergeometric test,  $p=0.048$ ). There were no significantly over-represented GO terms for all other comparisons (hypergeometric test,  $p>0.05$ ) (AA vs AE, EE vs EA, or AE vs EA).

**Table S5.** Over-represented gene ontology terms

| <b>AA versus EE</b> |                                              |                    |                               |                     |                   |
|---------------------|----------------------------------------------|--------------------|-------------------------------|---------------------|-------------------|
| GO_accession        | Description                                  | Term Type          | Over<br>Represented<br>pValue | Corrected<br>pValue | Number of<br>DEGs |
| Upregulated         |                                              |                    |                               |                     |                   |
| GO:0052636          | arabinosyltransferase activity               | molecular_function | 2.62E-07                      | 0.00062696          | 2                 |
| GO:0071766          | Actinobacterium-type cell wall<br>biogenesis | biological_process | 2.62E-07                      | 0.00062696          | 2                 |
| GO:0009273          | peptidoglycan-based cell wall<br>biogenesis  | biological_process | 2.99E-05                      | 0.047728            | 2                 |
| Downregulated       |                                              |                    |                               |                     |                   |
| NONE                |                                              |                    |                               |                     |                   |
|                     |                                              |                    |                               |                     |                   |
| <b>AA versus AE</b> |                                              |                    |                               |                     |                   |
| NONE                |                                              |                    |                               |                     |                   |
|                     |                                              |                    |                               |                     |                   |
| <b>EE versus EA</b> |                                              |                    |                               |                     |                   |
| NONE                |                                              |                    |                               |                     |                   |
|                     |                                              |                    |                               |                     |                   |
| <b>AE versus EA</b> |                                              |                    |                               |                     |                   |
| NONE                |                                              |                    |                               |                     |                   |

### *KEGG Pathway Enrichment Analysis of DEGs*

Several pathways were significantly enriched in the DEGs for all treatment comparisons. A comparison of KEGG pathways enriched between AA and EE yielded 3 significantly enriched pathways: ribosome biogenesis in eukaryotes, phagosome and oxidative phosphorylation. The former was upregulated in EE and the two latter pathways were downregulated. A comparison of KEGG pathways enriched between EE and EA yielded 2 significantly enriched, upregulated pathways: phagosome and oxidative phosphorylation. Between AA and AE KEGG pathway enrichment analysis yielded 2 significantly upregulated, enriched pathways: dorso-ventral axis formation and notch signaling pathway. A comparison of KEGG pathways enriched between AE and EA also yielded 2 significantly enriched, upregulated pathways: dorso-ventral axis formation and notch signaling pathway. For the latter two comparisons (AA vs AE and AE vs EA), the genes that related to those two specific pathways, dorso-ventral axis formation and notch signaling pathway, were the same gene (Gene ID 111113165).



|                              |          |              |                   |          |                   |           |               |
|------------------------------|----------|--------------|-------------------|----------|-------------------|-----------|---------------|
| Oxidative phosphorylation    | crg00190 | 1            | 97                | 0.012156 | 0.025259856       | 111114597 | crg:105319097 |
| Phagosome                    | crg04145 | 1            | 135               | 0.01684  | 0.025259856       | 111137486 | crg:105343071 |
|                              |          |              |                   |          |                   |           |               |
| <b>AE versus EA</b>          |          |              |                   |          |                   |           |               |
| Term                         | ID       | Input number | Background number | P-Value  | Corrected P-Value | Input     | KEGG_ID/KO    |
| Downregulated                |          |              |                   |          |                   |           |               |
| Dorso-ventral axis formation | crg04320 | 1            | 58                | 0.001838 | 0.002367749       | 111113165 | crg:105334163 |
| Notch signaling pathway      | crg04330 | 1            | 75                | 0.002368 | 0.002367749       | 111113165 | crg:105334163 |
